# Supplementary material
Source: publisher site journal article supplement (http://www.degruyter.com/publication/journal_key/TJB/downloadAsset/TJB_Information%20for%20Authors.pdf)
Supplement: Supplementary file 1 [file TJB_Information%20for%20Authors.pdf]

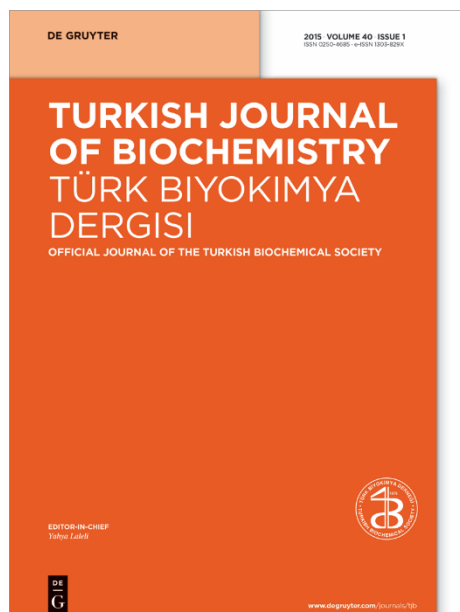

# TURKISH JOURNAL OF BIOCHEMISTRY

## Information for Authors

1. Scope and general policies of the Journal
2. Ethical conduct of research
3. Submission of manuscripts
4. Preparation of manuscripts
5. Post-acceptance

### 1. Scope and general policies of the Journal

Turkish Journal of Biochemistry (TJB) is an open access journal issued electronically every 2 months. The main aim of the journal is to support the research and publishing culture by ensuring that every published manuscript has an added value and thus providing international acceptance of the “readability” of the manuscripts published in the journal.

TJB publishes only English-language articles in the following categories:

- Research articles
- Reviews
- Short communications
- Case reports
- Opinion papers
- Technical notes
- Article commentaries (biochemistry, clinical biochemistry, molecular biology, molecular genetics, biotechnology, bioinformatics, bioengineering, translational research, and their educational disciplines)
- Editorials
- Letters to the editor

Highly focused review articles written by experts on the relevant subject will be published upon invitation of the Editorial Board. Submitted review articles, in compliance with the publishing principles of TJB can be published in the issue containing related research articles upon reviewers' evaluation. Short communications are intended to concise and quick publishing of a new finding. Publishing of research articles under this concept is decided by the Editorial Board, providing that the authors adhere to the publishing format. Case reports should document informative patient presentations on clinical and/or molecular pathology or original manuscripts on the diagnosis and follow-up of a group of disease (such as determination of variation or probability). Letters to the Editor should cover questions and/or comments on published articles or other related topics to establish a discussion forum. For the letters, concept and ethical compatibility are taken into consideration.

Manuscripts on development and application of new methodologies are published in the category “Technical reports”.

Submissions in the following fields are welcomed:

- Biochemistry
- Clinical biochemistry
- Molecular biology
- Molecular genetics
- Biotechnology
- Bioinformatics
- Bioengineering

**Peer review:** The Editorial Board preliminary reviews the submitted manuscripts for compliance with the publishing concept and instructions of the journal, whether manuscripts are focused to their main aim, validity of the statistical method used and adherence to ethical principles. Upon the preliminary evaluation, if required, manuscripts are sent back to the authors for revision. If revision is not required or upon the completion of required editorial revision, manuscripts are sent to at least 2 reviewers specialized in the topic and concept of the manuscript. Editorial Board makes sure that there is no conflict of interest while assigning the reviewers and names of the authors are not declared to the reviewers.

Members of the Scientific Advisory Board and other scientists related to the topic of the manuscript are assigned as reviewers. All reviewers' reports are sent to authors and the revisions of authors or their replies/opinions on reports are sent to the reviewers. Whether the manuscript will be published or not is decided upon the reviewers' opinions. If there is an editorial opinion for publishing the manuscript, it is also sent to the authors as editorial opinion.

The authors must provide the name, institution, country and e-mail address of three potential reviewers. Reviewers indicated by the authors are preferred to be of institutions and nationality different from those of any of the authors. Authors may also indicate names of reviewers whom they wish to be excluded from reviewing their manuscripts.

**Turnaround times:** TJB aspires to notify authors about the review decision within 6 weeks from submission date. Revised manuscripts should be returned within 6 weeks. Accepted articles are published online within 4 weeks after acceptance.

**Rejection of manuscripts:** Manuscripts dealing with subjects that have been well studied in the literature, and that do not resolve questions raised by previous studies, or manuscripts that are statistically underpowered, are likely to be rejected without peer review. This applies in particular to studies of genetic associations, which will be considered only if they contribute new insights and are statistically valid according to generally accepted criteria. Articles which are likely to affect the choice, performance or interpretation of clinical tests will be favored over those which do not, and animal or cell-culture studies need to justify their eligibility. Reporting of negative results must be justified by prior evidence that a positive result would be expected. Manuscripts are also returned to authors if they do not comply with the Information for Authors (e.g., if the number of words allowed for a certain article type will be exceeded).

**Unpublished material:** Submission of a manuscript to TJB implies that the work described has not been published previously, except in the form of an abstract, academic thesis or lecture; that it is not under consideration for publication elsewhere; that publication of the work is approved by all authors and tacitly or explicitly by the responsible authorities where the work was carried out; and that, if accepted, it will not be published elsewhere, in English, German, or in any other language, without the written consent of the Publisher.

## 2. Ethical conduct of research

For information on plagiarism, please refer to [COPE Committee on Publication Ethics](#). Please note that TJB uses the check program "iThenticate" to assess for potential overlap in prior publication(s). Any previously published material must be referenced appropriately in the manuscript.

For every submission to TJB, authors have to fill out and upload the [Template for Ethical and Legal Declarations](#) at the time of the original submission. Instructions on how to make declarations can be found [here](#).

Manuscripts and any other printed material published in the TJB represent the opinions of authors and should not be construed to reflect the opinions of the Editorial Board and/or the Executive Committee of the Turkish Biochemical Society.

**Open Access policy and copyright:** All articles undergo peer review and will be accepted for publication based on the quality of their scientific contribution. Choosing open access publication has no influence on the peer review or acceptance process. More information on De Gruyter's open access policies can be found [here](#).

Manuscripts are published with a Creative Commons Attribution license as currently displayed on <http://creativecommons.org/licenses/by/4.0>. The copyright stays with the author(s).

**Note for authors of NIH-funded research:** De Gruyter acknowledges that the author of a US-agency-funded article retains the right to provide a copy of the final manuscript to agency upon acceptance for publication as well as for public archiving in PubMed Central. Note that only the accepted author's version of the manuscript, not the PDF file of the published article, may be used for NIH archiving.

## 3. Submission of manuscripts

Please submit manuscripts exclusively online at:

<https://mc.manuscriptcentral.com/tjbiochem>

## 4. General information on preparation of manuscripts

All authors must be listed with an Open Researcher and Contributor ID (ORCID). ORCIDs of all authors should be provided either on the title page of the manuscript or in the ScholarOne user accounts. Authors can add ORCIDs only in their own accounts.

Detailed information of preparation of manuscripts for TJB can be found in the [Quick Checklist for Main Document](#)). Strictly adhere to the instructions. TJB provides authors with an individual template for every article type (go to Submit on the [journal website](#)).

**Studies dealing with diagnostic accuracy:** Please refer to the 2015 Standards for Reporting of Diagnostic Accuracy checklist ([STARD](#)).

**Systematic Reviews and Meta-Analyses of randomized controlled trials:** Please refer to the Preferred Reporting Items for Systematic Reviews and Meta-Analyses statement ([PRISMA](#)). Authors must include a suitable PRISMA flow chart in their submission. The flow diagram depicts the flow of information through the different phases of a systematic review. A template of the PRISMA flow diagram is available [here](#) as a PDF and Word document.

**Case Reports:** Please refer to the The CARE Guidelines: Consensus-based Clinical Case Reporting Guideline Development ([CARE](#)). Cases must contain an Introduction, the Case Description and a Discussion. At the end, authors must give 3-5 learning points.

**References:** Adhere strictly to the reference style of the Journal (Vancouver; recommendations of the “International Committee of Medical Journals Editors”; see [Reference Style](#)). All references mentioned in the Reference list must be mentioned in the text, and vice versa. List and number the references consecutively in the order that they appear in the text, including Tables and Figures. In the text, identify references by Arabic numerals in [parentheses]. Italic and boldface font type in the Reference section is not allowed. List all authors; if the number is 7 or more, list the first 6 names followed by et al. Identify authors by last name first, followed by up to 2 initials, without periods, indicating the authors’ first name. Only the first name of the title is capitalized, as well as proper names within the title. Journal names are abbreviated as indicated in PubMed and in the Web of Knowledge ([NIH.Linkout.Journals](#); [Web of Knowledge](#)), without periods. After the abbreviated journal name, give the year of publication, followed by a semicolon, volume number (but no issue number), followed by a double colon, and the page numbers, with the last page number in shortened format. Meeting abstracts may be cited only if published in journals. Unpublished observations and personal communications are cited only in the text. Correct linking of the references depends on strict adherence to Journal style.

[Refer to the end of this document for detailed examples of references.](#)

#### General format and length of article types accepted by TJB:

|                                         | Word limit | Word limit in abstract             | Number of keywords | Number of tables & figures | Number of references | Article structure                                                                                                                                                                         |
|-----------------------------------------|------------|------------------------------------|--------------------|----------------------------|----------------------|-------------------------------------------------------------------------------------------------------------------------------------------------------------------------------------------|
| <b>Research Article</b>                 | 3500       | 250, structured*                   | 5-6                | 8                          | 50                   | Structured into Introduction, Materials and methods, Results, Discussion                                                                                                                  |
| <b>Review</b>                           | 6000       | 200, structured**/<br>unstructured | 3-6                | 8                          | 150                  | Structured                                                                                                                                                                                |
| <b>Short Communication</b>              | 1500       | 200, structured*                   | 3-5                | 4                          | 20                   | Unstructured; Materials & methods are described in the legends to Figures and Tables                                                                                                      |
| <b>Case Report</b>                      | 1500       | 150, structured***                 | 3-5                | 2                          | 10                   | Structured into Introduction, Case presentation, Discussion, up to 5 Learning points                                                                                                      |
| <b>Technical Report</b>                 | 1500       | 150, structured*                   | 3-5                | 2                          | 10                   | Structured into Introduction, Materials and methods, Results, Discussion; Clinical technical reports should include and discuss the clinical significance of values and their deviations. |
| <b>Opinion Paper</b>                    | 3500       | 250, structured**/<br>unstructured | 3-6                | 2                          | 10                   | Structured                                                                                                                                                                                |
| <b>Letter to the Editor &amp; Reply</b> | 1200       | n/a                                | 3-5                | 2                          | 10                   | Unstructured                                                                                                                                                                              |
| <b>Editorial</b>                        | 1500       | n/a                                | n/a                | 1                          | 10                   | Structured or unstructured                                                                                                                                                                |

\*Objectives, Methods, Results, Conclusions; \*\*Objectives, Content, Summary and Outlook; \*\*\*Objectives, Case presentation, Conclusions.

## 5. Information for reviewers

TJB is a peer-reviewed journal. Since peer review helps authors and editors improve the quality of scientific manuscripts, it is crucial for scientific manuscript processing. The reviewers perform an invaluable task for the entire scientific and medical community. Therefore, all TJB editors would like to thank all scientists for giving their expertise and time to the journal by serving as reviewers. It is the responsibility of journal editors to the selection of appropriate reviewers for the relevant manuscript. Manuscripts are sent to at least 2 reviewers specialized in the topic and concept of the manuscript. All manuscripts should be strictly reviewed by the reviewers for their novelty and originality, methodology and scientific accuracy, importance, quality, clarity, ethical issue, and suitability for the journal.

The reviewers should consider the following main points for the evaluation of manuscripts:

- As a reviewer, if you believe that you are not competent to evaluate a manuscript please inform the editor when you receive the invitation.
- Reviewers will be anonymous to the authors unless they choose to disclose their identity by making a check in the review system.
- Manuscripts under peer review should be strictly confidential. Reviewers must not share manuscripts or discuss their content with anyone outside the peer-review process.
- The reviewer should aim to help the author improve the manuscript. The comments about the manuscript should be objective, constructive, honest, and courteous.
- As the editors of TJB, we encourage reviewers to report any scientific or publication misconduct.
- Reviewers should declare if they have a conflict of interest and recuse themselves from the peer-review process.
- Please complete your review within the time period specified when you accepted to review the manuscript.

Once again, as editors of TJB, we would like to thank all reviewers.

## 6. Post-acceptance

**Proofs:** The Editor-in-Chiefs will inform the Corresponding Author of the manuscript decision. Accepted manuscripts must be provided in a Word document containing the final text for typesetting. The Corresponding Author of an article will receive the proofs in electronic form to check for editing and type-setting accuracy. The final, accepted version of the manuscript must adhere to the above guidelines. Please check the final file of the article carefully because spelling mistakes, inconsistencies and errors will be faithfully translated into the typeset version. Major changes to the article after acceptance will not be considered without undergoing additional peer review and will cause extra costs.

**As per De Gruyter policy, no author list changes are permitted after acceptance of an article. The De Gruyter production team is instructed to enforce this policy during the production/proofing process.**

The electronic files of typeset articles in Adobe Acrobat PDF format are provided to the corresponding author. They will receive an e-mail notification that their article has been published online.

**Please contact the Editorial Office with any further questions:** Heike Jahnke, T: +49 30 26005-220, E-mail: [heike.jahnke@deGruyter.com](mailto:heike.jahnke@deGruyter.com)

| In-text citation                                           |                                                                                                                                                                                                                                                                                |
|------------------------------------------------------------|--------------------------------------------------------------------------------------------------------------------------------------------------------------------------------------------------------------------------------------------------------------------------------|
| Single reference                                           | [1]                                                                                                                                                                                                                                                                            |
| Series of references                                       | [2, 8, 25]                                                                                                                                                                                                                                                                     |
| Range of references                                        | [5–12]                                                                                                                                                                                                                                                                         |
| Citation order                                             | Sequential                                                                                                                                                                                                                                                                     |
| Issue numbers                                              | Not allowed                                                                                                                                                                                                                                                                    |
| Reference list                                             |                                                                                                                                                                                                                                                                                |
| Reference type                                             | Example                                                                                                                                                                                                                                                                        |
| Reference list label                                       | Numbered without bracket                                                                                                                                                                                                                                                       |
| 1. Journal                                                 | 1. Raustorp A, Mattsson E, Svensson K, Costa PT Jr. Physical activity, body composition and physical self-esteem: a 3-year follow-up study among adolescents in Sweden. Scand J Med Sci Sports 2006;16:258–66.                                                                 |
| 2. Journal with supplement                                 | 2. Sallis JF, Saelens BE. Assessment of physical activity by self-report: status, limitations, and future directions. Res Q Exerc Sport 2000;71(2 Suppl):S1–14.                                                                                                                |
| 3. Collaboration                                           | 3. WHO. The diagnosis and management of non-alcoholic fatty liver disease: practice guideline by the American Association for the Study of Liver Diseases, American College of Gastroenterology, and the American Gastroenterological Association. Hepatology 2012;55:2005–23. |
| 4. et al. usage (more than 6 authors = 6 authors + et al.) | 4. Kaye K, Day RD, Hair EC, Moore KA, Hadley AM, Teixeira PJ, et al. Parent marital quality and the parent-adolescent relationship: effects on sexual activity among adolescents and youth. Marriage Fam Rev 2009;45:270–88.                                                   |

|                                                |                                                                                                                                                                                                                                                                                                                                                                                       |
|------------------------------------------------|---------------------------------------------------------------------------------------------------------------------------------------------------------------------------------------------------------------------------------------------------------------------------------------------------------------------------------------------------------------------------------------|
| 5. Epub ahead of print                         | 5. Mason EB, Burkhardt K, Lazebnik R. Adolescent stress management in a primary care clinic. J Pediatr Health Care 2018 Sep 3. DOI: 10.1016/j.pedhc.2018.08.001 [Epub ahead of print].                                                                                                                                                                                                |
| 6. Journal – in press                          | 6. Tappy L, Lara KA. Metabolic effects of fructose and the worldwide increase in obesity. Physiol Rev, in press.                                                                                                                                                                                                                                                                      |
| 7. Book/monograph                              | 7. Shek DTL, Sun RCF, Merrick J. University and college students. Health and development issues for the leaders of tomorrow. New York: Nova Science; 2013.                                                                                                                                                                                                                            |
| 8. Book with edition                           | 8. Joannopoulos JD, Johnson SG, Winn JN, Meade RD. Photonic crystals: molding the flow of light, 2nd ed. Princeton, NJ: Princeton University Press; 2008:350 p.                                                                                                                                                                                                                       |
| 9. Edited book                                 | 9. Shek DTL, Ma C, Yu L, Merrick J, editors. Human developmental research. Experience from research in Hong Kong. New York: Nova Science; 2014.                                                                                                                                                                                                                                       |
| 10. Edited book with chapter title and editors | 10. Halpen-Felsher BL, Morrell HE. Preventing and reducing tobacco use. In: Berlan ED, Bravender T, editors. Adolescent medicine today: a guide to caring for the adolescent patient [Internet]. Singapore: World Scientific Publishing Co.; 2012.                                                                                                                                    |
| 11. Edited book series                         | 11. Forghieri F, Tkach RW, Chraplyvy AR. Optical fiber telecommunications, Kaminov IP, Koch TL, editors. San Diego, CA: Academic; 1997, vol IIIA.                                                                                                                                                                                                                                     |
| 12. Proceedings/Conferences                    | 12. Musaka K, Akasaka Y, Suzuki Y, Kamiya T. Novel network fiber to manage dispersion at 1.55 $\mu\text{m}$ with combination of 1.3 $\mu\text{m}$ zero dispersion single mode fiber. In: Proceedings of the symposium on robotics, mechatronics and animatronics in the creative and entertainment industries and arts. SSAISB 2005. University of Hertfordshire, Hatfield, UK; 2005. |
| 13. Electronic publications (Available from)   | 13. IASO. Epidemiology of childhood overweight & obesity in India: a systematic review. International Association for the Study of Obesity;                                                                                                                                                                                                                                           |

|                                           |                                                                                                                                                                                                                                                                                                                             |
|-------------------------------------------|-----------------------------------------------------------------------------------------------------------------------------------------------------------------------------------------------------------------------------------------------------------------------------------------------------------------------------|
|                                           | 2012. Available from:<br><a href="http://www.iaso.org/iotf/obesity/obesitytheglobalepidemic">http://www.iaso.org/iotf/obesity/obesitytheglobalepidemic</a>                                                                                                                                                                  |
| 14. Electronic publications<br>(Accessed) | 14. IPAQ Group. Guidelines for data processing and analysis of the international physical activity questionnaire (IPAQ) – short and long forms [Online]. Available from: <a href="https://sites.google.com/site/theipaq/scoring-protocol">https://sites.google.com/site/theipaq/scoring-protocol</a> [Accessed 4 Apr 2013]. |
| 15. Thesis/Dissertation                   | 15. Cotruvo, J. Kinetic model for chlorophyll degradation [Ph.D. thesis]. Cambridge, MA: Massachusetts Institute of Technology; 1996.                                                                                                                                                                                       |
| 16. Report                                | 16. Rowe IL, Carson NE. Medical manpower in Victoria. East Bentleigh (AU): Monash University, Department of Community Practice; 1981. 35 p., Report No. 4.                                                                                                                                                                  |
| 17. Patent                                | 17. Pagedas AC. Flexible endoscopic grasping and cutting device and positioning tool assembly. United States patent 20020103498, 2002.                                                                                                                                                                                      |
| 18. Standards                             | 18. Frequency response and bias, NERC Reliability Standard BAL-003-0.1b, May 2009 [Online]. Available from:<br><a href="http://www.nerc.com/files/BAL-003-0_1b.pdf">http://www.nerc.com/files/BAL-003-0_1b.pdf</a>                                                                                                          |
